# Supplementary material for: Synergistic toughening of composite fibres by self-alignment of reduced graphene oxide and carbon nanotubes
Source: PubMed Central journal article supplement — Nat Commun. 2012 Jan 31;3:650–. doi: 10.1038/ncomms1661 (PMC3272576; doi:10.1038/ncomms1661), 2012-01-31
Supplement: ncomms1661-s1.pdf [file ncomms1661-s1.pdf]

# Supplementary Information

## Supplementary Figures

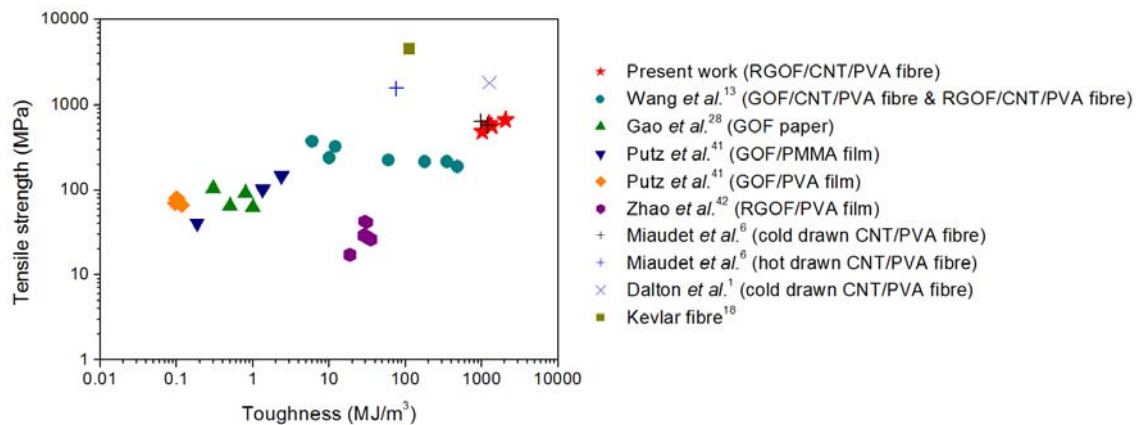

**Supplementary Figure S1. Comparison of mechanical properties.** Tensile strength versus toughness for various graphene-based materials and other reference materials. The red stars are values for the hybrid fibres made in this work.

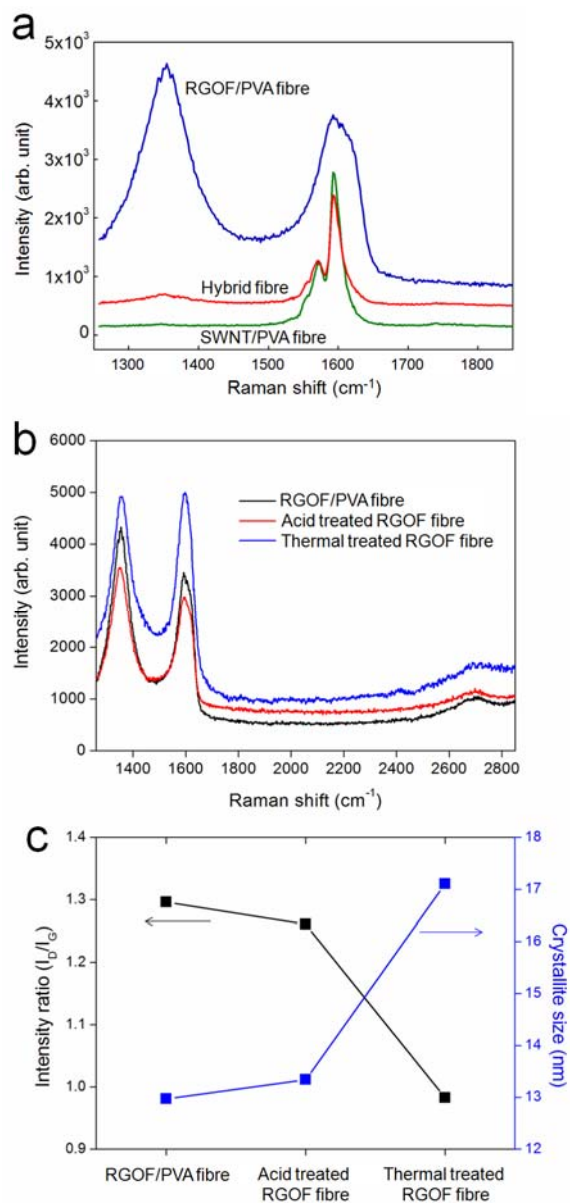

**Supplementary Figure S2. Raman characterization of wet-spun fibres.** (a) Raman spectra for carbon nanoparticles incorporated in 1:1 hybrid, SWNT/PVA, and RGO/PVA fibres. (b) Raman spectra showing the D, G, and 2D bands of fibres containing RGOs. (c) Graphs showing the ratios of D to G band intensities and the thereby calculated crystallite sizes ( $L_a$ ) of RGOs in solution spun fibres. The acid treated RGO fibre and thermal treated RGO fibre correspond to the RGO fibre annealed at 600°C to remove PVA and the RGO fibre acid-treated (37% HCl) to remove PVA, respectively.

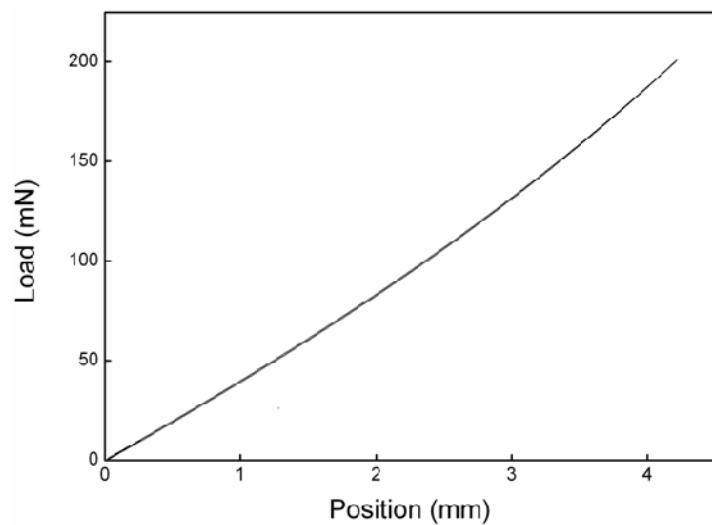

**Supplementary Figure S3. Mechanical evaluation of a helical spring made from a 1:1 hybrid fibre.** Force-displacement curve for a spring-shaped hybrid fibre made by setting the shape of a helically wound fibre at 150° C. The spring constant derived from the slope of this curve is ~41 N/m.

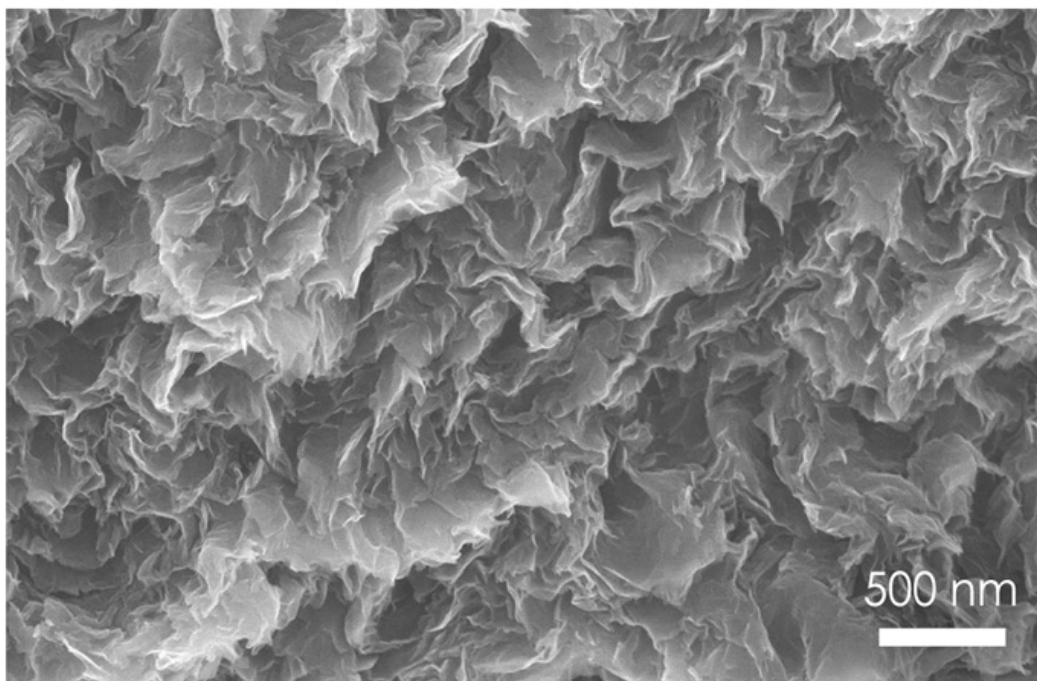

**Supplementary Figure S4. Wrinkled RGOFs in fibres.** SEM image showing the cross section of a RGOF fibre that has been annealed at 600 °C to remove the PVA.

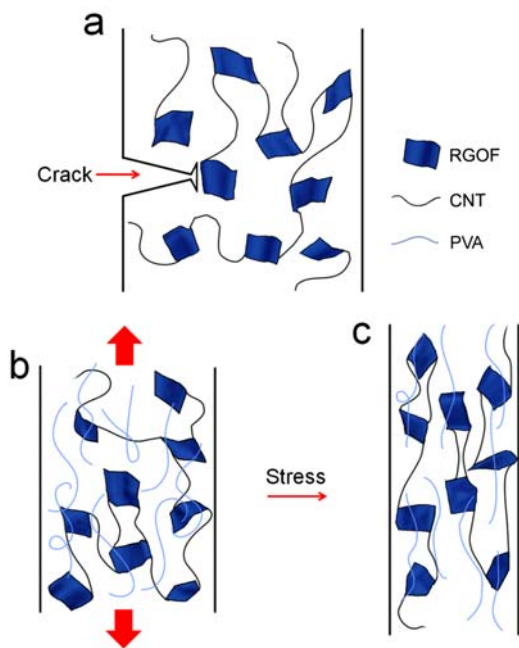

**Supplementary Figure S5. Toughening mechanisms for hybrid fibres.** (a) Picture illustrating crack deflection by a RGOF in a hybrid fibre. (b, c) Illustrations showing plastic deformation of the PVA matrix during tensile elongation: (b) partially aligned RGOFs and CNTs in a moderately oriented PVA matrix before substantial stretch and (c) highly aligned RGOFs and CNTs in a highly stretched fibre.

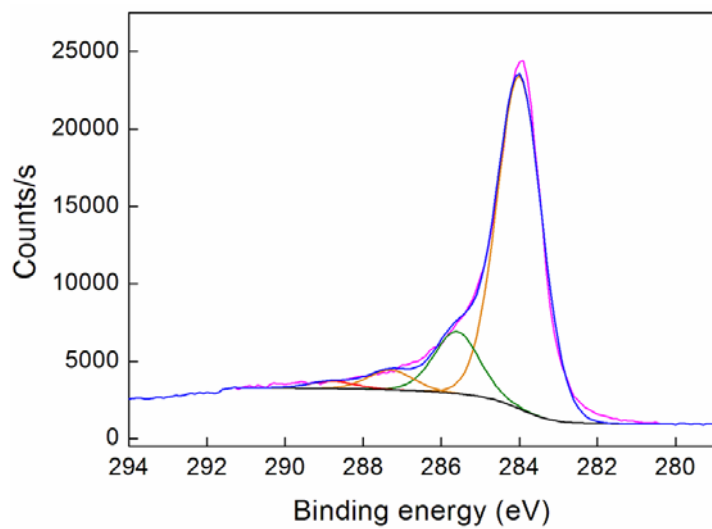

**Supplementary Figure S6. Oxidation of RGOs.** XPS data for RGOs. Carboxylate groups (O-C=O) provide binding energy peaks at 287.3 eV and 288.7 eV<sup>43,44</sup>.

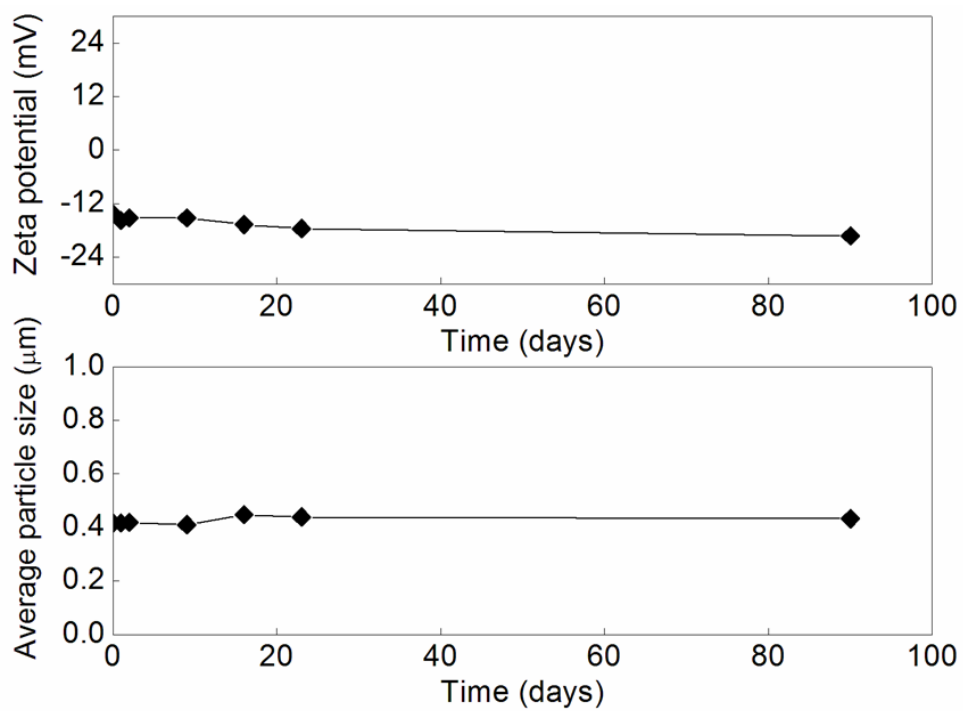

**Supplementary Figure S7. Stability of RGOs in DMF.** Zeta potential (upper) and particle size (lower) measurements as a function of time for RGOs dispersed in dimethylformamide.

### Supplementary References

41. Putz, K. W., Compton, O. C., Palmeri, M. J., Nguyen, S. T. & Brinson, L. C. High-nanofiller-content graphene oxide–polymer nanocomposites via vacuum-assisted self-assembly. *Adv. Funct. Mater.* **20**, 3322–3329 (2010).
42. Zhao, X., Zhang, Q., Chen, D. & Lu P. Enhanced mechanical properties of graphene-based poly(vinyl alcohol) composites. *Macromolecules* **43**, 2357–2363 (2010).
43. Eda, G., Fanchini, G. & Chhowalla, M. Large-area ultrathin films of reduced graphene oxide as a transparent and flexible electronic material. *Nature Nanotech.* **3**, 270-274 (2008).
44. Xu, Y., Bai, H., Lu, G., Li, C. & Shi, G. Flexible Graphene Films via the Filtration of Water-Soluble Noncovalent Functionalized Graphene Sheets. *J. Am. Chem. Soc.* **130**, 5856-5857 (2008).
